# Supplementary material for: Novel endogenous retrovirus-derived transcript expressed in the bovine placenta is regulated by WNT signaling
Source: PubMed Central journal article supplement — Biochem J. 2017 Oct 10;474(20):3499–512. doi: 10.1042/BCJ20170531 (PMC5633919; doi:10.1042/bcj20170531), 2017-10-10
Supplement: BCJ-474-3499-s1.pdf [file BCJ-474-3499-s1.pdf]

Supplemental Figure 1. Sakurai *et al.*

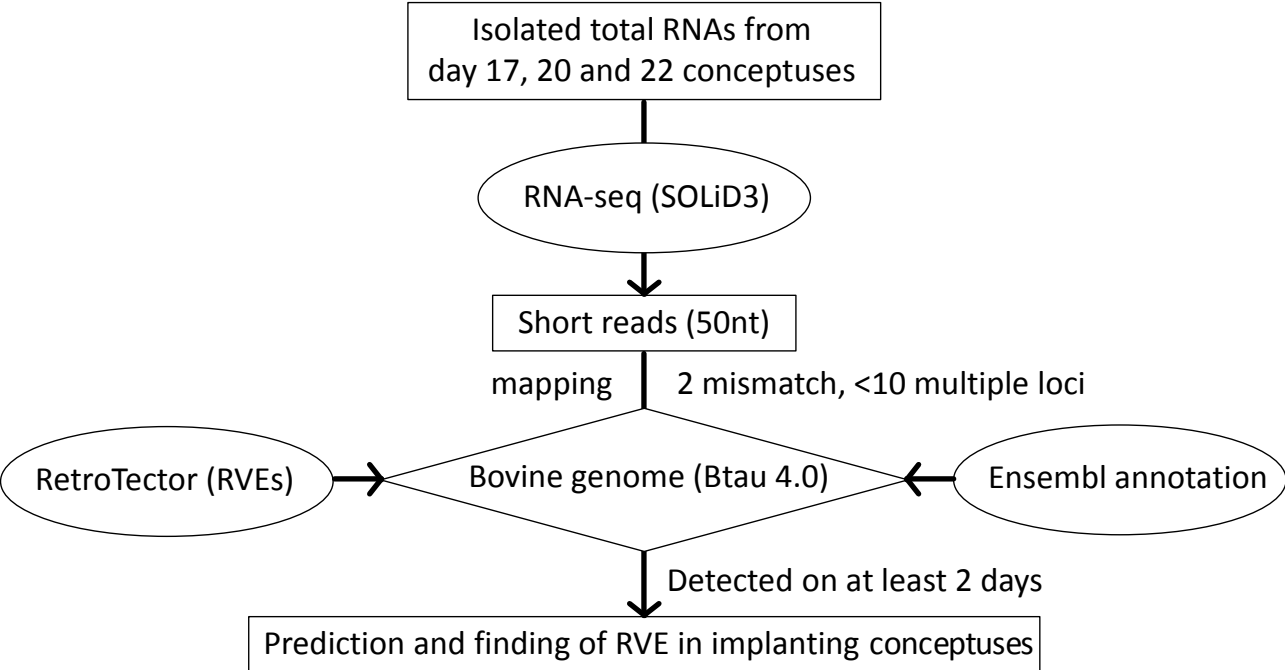



Supplemental Figure 3. Sakurai *et al.*

**A**

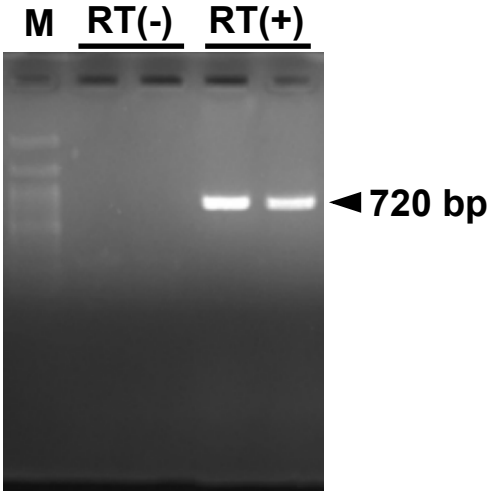

**B**

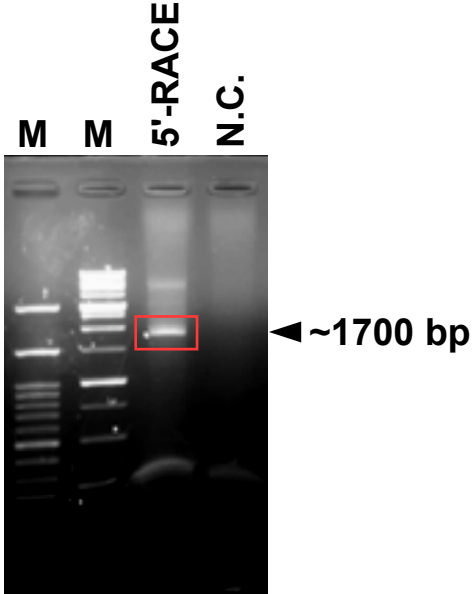

**C**

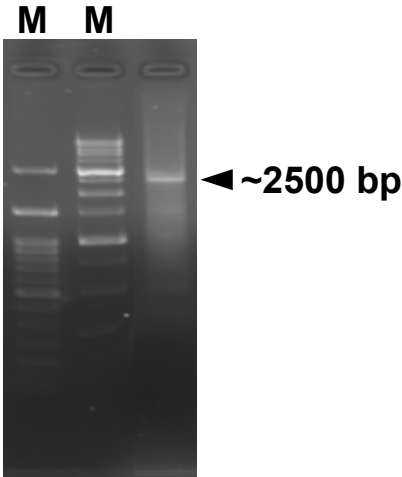



Supplemental Figure 5. Sakurai *et al.*

**A**

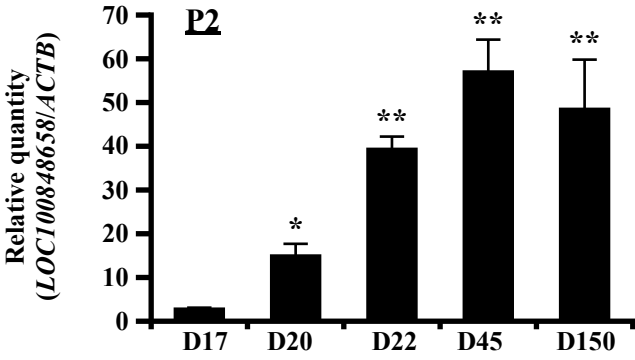

**B**

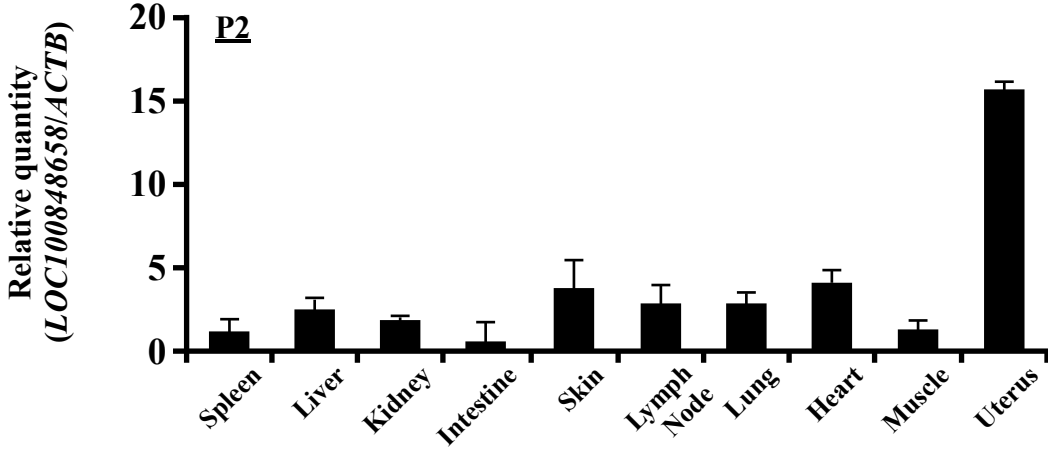

Supplemental Figure 6. Sakurai *et al.*

**A**

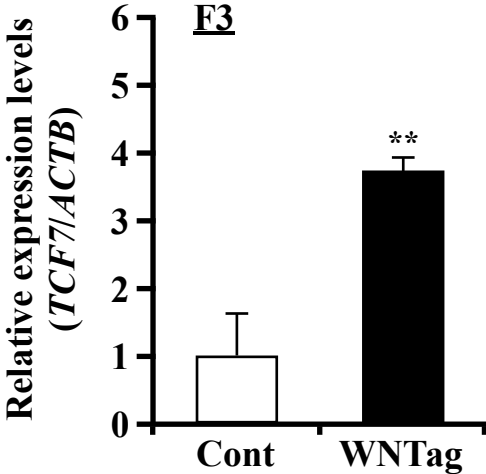

**B**

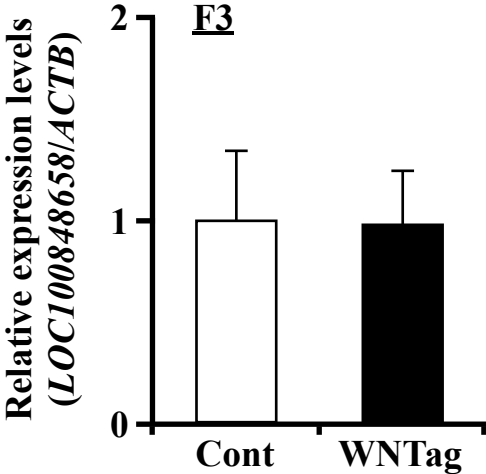

**Supplemental Table 1. The listing of detected candidate *BERVs* with our criteria**

| <b>Transcript ID</b> | <b>Gene ID</b> | <b>Chr.</b> | <b>Tag</b> | <b>Gene length</b> |
|----------------------|----------------|-------------|------------|--------------------|
| ENSBTAT00000012578   | IPI00707306.1  | 2           | +          | 707                |
| ENSBTAT00000056525   | IPI00904065.1  | 2           | N.D.       | 819                |
| ENSBTAT00000057505   | IPI00906274.1  | 2           | N.D.       | 1848               |
| ENSBTAT00000010721   | SUNC1_BOVIN    | 4           | N.D.       | 1405               |
| ENSBTAT00000052900   | IPI00906993.1  | 4           | +          | 2472               |
| ENSBTAT00000015113   | IPI00700272.3  | 5           | N.D.       | 1536               |
| ENSBTAT00000007724   | IPI00701691.3  | 6           | +          | 1827               |
| ENSBTAT00000057217   | IPI00906900.1  | 6           | +          | 1896               |
| ENSBTAT00000053802   | IPI00906900.1  | 6           | +          | 1920               |
| ENSBTAT00000052494   | IPI00907124.1  | 7           | +          | 1617               |
| ENSBTAT00000052446   | IPI00907124.1  | 7           | +          | 2463               |
| ENSBTAT00000045982   | IPI00838228.2  | 11          | +          | 1680               |
| ENSBTAT00000056733   | -              | 11          | N.D.       | 1788               |
| ENSBTAT00000055392   | IPI00905140.1  | 15          | N.D.       | 1482               |
| ENSBTAT00000055549   | Q8WN39_BOVIN   | 15          | N.D.       | 1035               |
| ENSBTAT00000055890   | IPI00904459.1  | 19          | N.D.       | 1515               |
| ENSBTAT00000053256   | IPI00907097.1  | 21          | N.D.       | 1686               |
| ENSBTAT00000056855   | IPI00907097.1  | 21          | N.D.       | 1830               |
| ENSBTAT00000052004   | IPI00904742.1  | 24          | N.D.       | 1716               |
| ENSBTAT00000056638   | IPI00904223.1  | 24          | +          | 2469               |
| ENSBTAT00000054993   | LOC100138895   | 28          | N.D.       | 1440               |
| ENSBTAT00000048899   | IPI00904926.1  | 29          | N.D.       | 1878               |
| ENSBTAT00000029110   | IPI00904926.1  | 29          | N.D.       | 1881               |
| ENSBTAT00000029917   | IPI00694551.3  | X           | +          | 1983               |
| ENSBTAT00000053686   | IPI00908010.1  | Un.004.233  | N.D.       | 1524               |
| ENSBTAT00000055205   | IPI00907308.1  | Un.004.278  | N.D.       | 1836               |
| ENSBTAT00000056273   | IPI00904145.1  | Un.004.371  | N.D.       | 1731               |
| ENSBTAT00000055667   | XR_042937.1    | Un.004.3054 | N.D.       | 1779               |
| ENSBTAT00000056521   | IPI00905125.1  | Un.004.3323 | N.D.       | 1878               |
| ENSBTAT00000052873   | IPI00905125.1  | Un.004.3323 | N.D.       | 1902               |
| ENSBTAT00000056462   | IPI00903636.1  | Un.004.3323 | N.D.       | 1899               |
| ENSBTAT00000056109   | IPI00903636.1  | Un.004.3323 | N.D.       | 1995               |
| ENSBTAT00000052852   | IPI00907442.1  | Un.004.5504 | N.D.       | 1683               |
| ENSBTAT00000035736   | IPI00701407.3  | Un.004.662  | N.D.       | 1434               |
| ENSBTAT00000053608   | IPI00906522.1  | Un.004.974  | N.D.       | 1815               |

**Chr.:**Chromosome, **Tag:** Detectable with SOLiD3 analysis, **+**: Detected, **N.D.:** Not detected
